# Supplementary material for: The Effect of HMGB1 and HMGB2 on Transcriptional Regulation Differs in Neuroendocrine and Adenocarcinoma Models of Prostate Cancer
Source: MDPI journal article supplement (doi:10.3390/ijms25063106), 2024-03-07
Supplement: s1 [file s1]

|   | 1      | 2     | 3      | 4     | 5      | 6     | 7     | 8      | 9        | 10    | 11       | 12    |   |
|---|--------|-------|--------|-------|--------|-------|-------|--------|----------|-------|----------|-------|---|
| A | ACTA2  | BRCA1 | CDK1   | CYR61 | GSTM5  | IL8   | MET   | NOTCH1 | PRKCA    | SOD2  | TLR4     | TBP   | A |
| B | AKT1   | CAV1  | CDKN1A | DNMT1 | GSTP1  | JUNB  | MKI67 | NR3C1  | PRKCB    | SP1   | TNFAIP3  | GAPDH | B |
| C | AR     | CCL5  | CDKN2A | EGR1  | HIF1A  | KDR   | MLH1  | PCNA   | PRKCZ    | SPARC | TNFRSF1A | HPRT1 | C |
| D | BAX    | CCNA2 | COL1A1 | ESR1  | HMOX1  | LARP6 | MMP1  | PDPK1  | PTEN     | SPP1  | TOP2A    | gDNA  | D |
| E | BCL2   | CCNB1 | CTBP2  | EZH2  | IGF1   | MAPK1 | MMP2  | PIK3CA | RBM47    | TGFB1 | TYMS     | PCR   | E |
| F | BCL2L1 | CCND2 | CTGF   | FGF2  | IGF1R  | MAPK3 | MMP7  | PLAU   | RRM2     | THBS1 | VEGFA    | RQ1   | F |
| G | BDNF   | CD44  | CTNNB1 | FN1   | IGFBP3 | MCL1  | MMP9  | PLAUR  | RXRA     | TIMP1 | WNT5A    | RQ2   | G |
| H | BIRC5  | CDH1  | CXCL12 | GSK3B | IL6    | MDM2  | MYC   | PPARG  | SERPINE1 | TIMP3 | ZWINT    | RT    | H |
|   | 1      | 2     | 3      | 4     | 5      | 6     | 7     | 8      | 9        | 10    | 11       | 12    |   |

**Figure S4.** Schematic design of PrimePCR Pathway Plate, 96 well Prostatic neoplasms Tier 1 H96, Hsa
