# Supplementary material for: The Effect of HMGB1 and HMGB2 on Transcriptional Regulation Differs in Neuroendocrine and Adenocarcinoma Models of Prostate Cancer
Source: MDPI journal article supplement (doi:10.3390/ijms25063106), 2024-03-07
Supplement: s1 [file s1]

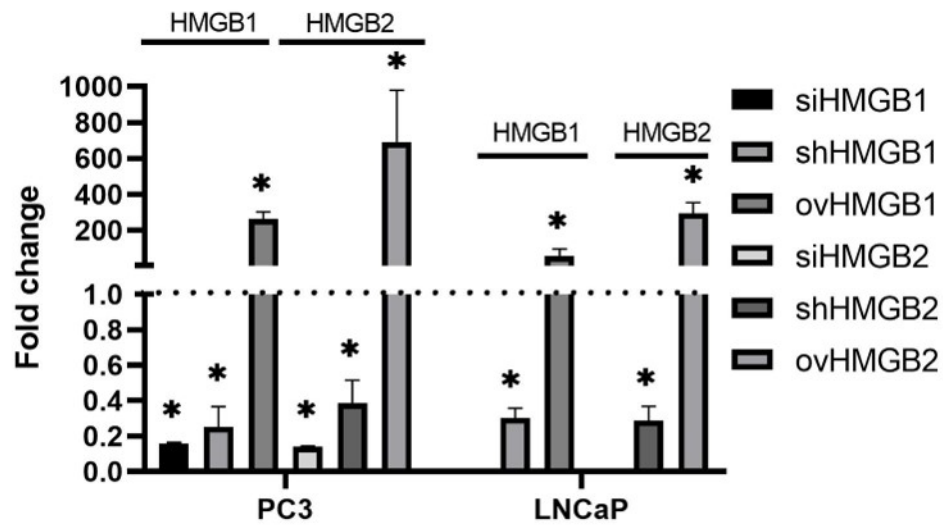

**Figure S2.** Verification of HMGB1/2 silencing and overexpression in experiments shown in figure 3. \* represent  $p < 0.05$
