# Supplementary material for: The Effect of HMGB1 and HMGB2 on Transcriptional Regulation Differs in Neuroendocrine and Adenocarcinoma Models of Prostate Cancer
Source: MDPI journal article supplement (doi:10.3390/ijms25063106), 2024-03-07
Supplement: s1 [file s1]

**Table S4.** Primers used in this study

| Gene          | Sequence                                                            | TM   | Technique               |
|---------------|---------------------------------------------------------------------|------|-------------------------|
| GAPDH         | F-CCTCCTGCACCACCAACTG                                               | 59.1 | qRT-PCR                 |
|               | R- TGGCAGTGATGGCATGGA                                               | 58.8 | qRT-PCR                 |
| HMGB1         | F-TCAAAGGAGAACATCCTGGCC                                             | 61.4 | qRT-PCR                 |
|               | R-GCTTGTCATCTGCAGCAGTGTT                                            | 60.4 | qRT-PCR                 |
| HMGB2         | F-GAGCAGTCAGCCAAAGATAAACA                                           | 60.8 | qRT-PCR                 |
|               | R-TCCTGCTTCACTTTTGCCCTT                                             | 61.5 | qRT-PCR                 |
| FN1           | F-AGTCAGCTGCCAAGAGACAG                                              | 55.9 | qRT-PCR                 |
|               | R-ACGTCCTGCCATTGTAGGTG                                              | 58.0 | qRT-PCR                 |
| IGFBP3        | F-TCAGAGCACAGATACCCAGAAC                                            | 57.8 | qRT-PCR                 |
|               | R-GCACATTGAGGAACTTCAGGTG                                            | 59.6 | qRT-PCR                 |
| TYMS          | F-GCCTGAAGCCAGGTGACTTT                                              | 59.1 | qRT-PCR                 |
|               | R-CTCGCTGAAGCTGAATTTTC                                              | 56.9 | qRT-PCR                 |
| ZWINT         | F-GGATCTTTCTCCATGCTGCT                                              | 56.6 | qRT-PCR                 |
|               | R-TGTGTCCTTCAAGGCTGTTG                                              | 56.5 | qRT-PCR                 |
| SERPINE1      | F-GGACACCCTCAGCATGTTCA                                              | 59.4 | qRT-PCR                 |
|               | R-GAGCTGGGCACTCAGAATGT                                              | 59.4 | qRT-PCR                 |
| CDK1          | F-CAGGTCAAGTGGTAGCCATGA                                             | 58.4 | qRT-PCR                 |
|               | R-AAGCACATCCTGAAGACTGACT                                            | 59.0 | qRT-PCR                 |
| DsR-<br>HMGB2 | F-<br>GTCGCCACCATGGGTAAAGGAGACCCCAACAA<br>GCCGCGG                   | 90.5 | Insert<br>pCMVHMG<br>B2 |
|               | R-<br>TTTACCCATGGTGGCGACCGGTAGCGCTAGCG<br>GATCTGACG<br>GTTCACTAAACC | 92.7 | Insert<br>pCMVHMG<br>B2 |
| DsR-<br>HMGB1 | F-<br>GTCGCCACCATGGGCAAAGGAGATCCTAAGAA<br>GCCGAGA                   | 87.3 | Insert<br>pCMVHMG<br>B1 |
|               | R-<br>TTTGCCCATGGTGGCGACCGGTAGCGCTAGC<br>GGATCTGACG                 | 92.1 | Insert<br>pCMVHMG<br>B1 |
| shHMGB1       | CCCAGATGCTTCAGTCAACTT                                               | 56.8 | shRNA                   |
| shHMGB2       | GCAAAGGAGAAGTCGAAGTTT                                               | 55.8 | shRNA                   |
| shscrambled   | CAACAAGATGAAGAGCACCAA                                               | 56.2 | shRNA                   |
