# Supplementary material for: The Effect of HMGB1 and HMGB2 on Transcriptional Regulation Differs in Neuroendocrine and Adenocarcinoma Models of Prostate Cancer
Source: MDPI journal article supplement (doi:10.3390/ijms25063106), 2024-03-07
Supplement: s1 [file s1]

**Table S3.-** List of public studies of different cohorts of PCa patients used in the correlation analyses described in section 2.2.

| <b>cBioportal Study</b>           | <b>Study Information</b>         | <b>LINK</b>                                                                                                                                                     | <b>Cohort size</b> |
|-----------------------------------|----------------------------------|-----------------------------------------------------------------------------------------------------------------------------------------------------------------|--------------------|
| MSK, Cancer Cell 2010             | doi: 10.1016/j.ccr.2010.05.026   | <a href="https://www.cbioportal.org/study/summary?id=prad_mskcc">https://www.cbioportal.org/study/summary?id=prad_mskcc</a>                                     | 240                |
| DKFZ, Cancer Cell 2018            | doi: 10.1016/j.ccell.2018.10.016 | <a href="https://www.cbioportal.org/study/summary?id=prostate_dkfz_20186">https://www.cbioportal.org/study/summary?id=prostate_dkfz_20186</a>                   | 324                |
| Fred Hutchinson CRC, Nat Med 2016 | doi: 10.1038/nm.4053             | <a href="https://www.cbioportal.org/study/summary?id=prad_fhcr">https://www.cbioportal.org/study/summary?id=prad_fhcr</a>                                       | 176                |
| SUC2C PCF Dream Team Cell 2015    | doi: 10.1016/j.cell.2015.05.001  | <a href="https://www.cbioportal.org/study/summary?id=prad_su2c_2015">https://www.cbioportal.org/study/summary?id=prad_su2c_2015</a>                             | 150                |
| SUC2C PCF Dream Team PNAS 2019    | doi: 10.1073/pnas.1902651116     | <a href="https://www.cbioportal.org/study/summary?id=prad_su2c_2019">https://www.cbioportal.org/study/summary?id=prad_su2c_2019</a>                             | 444                |
| TCGA, Cell 2015                   | doi: 10.1016/j.cell.2015.10.025  | <a href="https://www.cbioportal.org/study/summary?id=prad_tcga_pub">https://www.cbioportal.org/study/summary?id=prad_tcga_pub</a>                               | 333                |
| TCGA, Firehose Legacy             |                                  | <a href="https://www.cbioportal.org/study/summary?id=prad_tcga">https://www.cbioportal.org/study/summary?id=prad_tcga</a>                                       | 501                |
| TCGA, PanCancer Atlas             |                                  | <a href="https://www.cbioportal.org/study/summary?id=prad_tcga_pan_can_atlas_2018">https://www.cbioportal.org/study/summary?id=prad_tcga_pan_can_atlas_2018</a> | 494                |
