# Supplementary material for: The Effect of HMGB1 and HMGB2 on Transcriptional Regulation Differs in Neuroendocrine and Adenocarcinoma Models of Prostate Cancer
Source: MDPI journal article supplement (doi:10.3390/ijms25063106), 2024-03-07
Supplement: s1 [file s1]

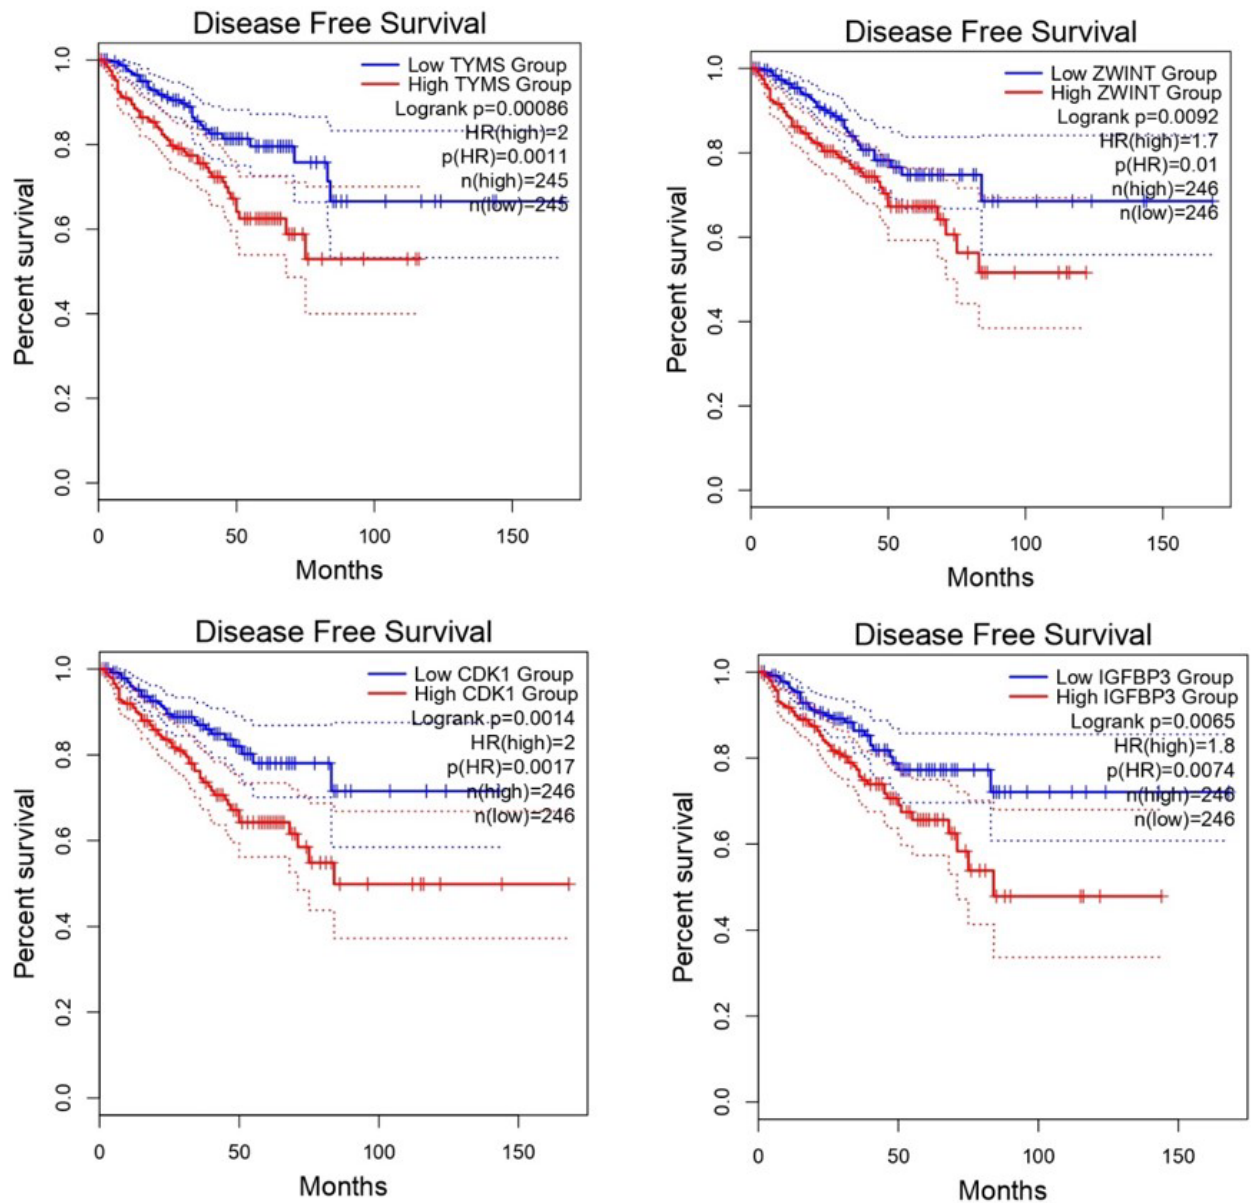

**Figure S3.** DFS analysis based on gene expression by applying the Log-rank test (Mantel-Cox test). The PRAD TCGA cohort threshold between the “high” and “low” groups was set to the median, the confidence interval to 95%, and the p-value to 0.01.
