# Supplementary material for: The Effect of HMGB1 and HMGB2 on Transcriptional Regulation Differs in Neuroendocrine and Adenocarcinoma Models of Prostate Cancer
Source: MDPI journal article supplement (doi:10.3390/ijms25063106), 2024-03-07
Supplement: s1 [file s1]

**Table S2.** Expression of genes in pre-designed primer panels “The PrimePCR Pathway Plate, 96 well Prostatic neoplasms Tier 1 H96, Hsa (Biorad, Hercules, CA, USA)” after *HMGB2* silencing (siHMGB2) and control (si-Control) in three independent biological replica. NA , not acquired.

| Gene symbol   | si-HMGB2 |       |       | si-Control |       |       | Fold change | p-value   |
|---------------|----------|-------|-------|------------|-------|-------|-------------|-----------|
|               | Cq1      | Cq2   | Cq3   | Cq1        | Cq2   | Cq3   |             |           |
| <i>ACTA2</i>  | 32,52    | 31,84 | 31,85 | 30,98      | 29,55 | 30,50 | 0,33        | 0,00398   |
| <i>AKT1</i>   | 25,43    | 24,97 | 25,76 | 25,84      | 24,30 | 25,00 | 0,87        | 0,06285   |
| <i>AR</i>     | NA       | NA    | NA    | 35,98      | 35,18 | 36,41 | -           | -         |
| <i>BAX</i>    | 26,87    | 26,29 | 27,64 | 27,89      | 25,72 | 26,35 | 0,91        | 0,71245   |
| <i>BCL2</i>   | 29,53    | 29,02 | 29,81 | 31,12      | 30,14 | 30,81 | 2,60        | 0,00095   |
| <i>BCL2L1</i> | 26,45    | 26,02 | 27,17 | 25,00      | 23,08 | 23,80 | 0,18        | 0,00058   |
| <i>BDNF</i>   | 29,24    | 28,99 | 28,96 | 29,08      | 28,21 | 29,19 | 0,94        | 0,78343   |
| <i>BIRC5</i>  | 23,74    | 23,26 | 23,91 | 23,89      | 22,64 | 23,36 | 0,87        | 0,06232   |
| <i>BRCA1</i>  | 28,27    | 27,89 | 28,07 | 27,58      | 26,75 | 27,46 | 0,63        | 0,05523   |
| <i>CAV1</i>   | 25,02    | 24,46 | 24,92 | 23,34      | 22,31 | 23,10 | 0,30        | 0,00057   |
| <i>CCL5</i>   | 36,01    | 36,67 | 37,65 | 36,22      | 35,81 | NA    | -           | -         |
| <i>CCNA2</i>  | 25,28    | 24,82 | 25,06 | 25,59      | 24,44 | 25,13 | 1,10        | 0,41812   |
| <i>CCNB1</i>  | 25,01    | 24,47 | 24,83 | 25,14      | 23,97 | 24,67 | 0,98        | 0,82676   |
| <i>CCND2</i>  | 35,22    | 37,92 | 36,09 | NA         | 36,03 | 37,54 | -           | -         |
| <i>CD44</i>   | 23,21    | 22,79 | 23,01 | 23,57      | 22,86 | 23,31 | 1,30        | 0,18925   |
| <i>CDH1</i>   | 27,49    | 27,19 | 27,20 | 30,01      | 28,56 | 29,54 | 4,65        | 0,00057   |
| <i>CDK1</i>   | 23,86    | 23,41 | 23,61 | 23,48      | 22,70 | 23,36 | 0,81        | 0,28834   |
| <i>CDKN1A</i> | 29,75    | 29,16 | 30,43 | 30,27      | 28,28 | 29,01 | 0,73        | 0,16998   |
| <i>CDKN2A</i> | 25,08    | 24,69 | 24,82 | 25,11      | 25,01 | 25,42 | 1,37        | 0,34815   |
| <i>COL1A1</i> | 32,14    | 31,07 | 32,41 | 32,08      | 30,73 | 30,87 | 0,71        | 0,11980   |
| <i>CTBP2</i>  | 25,84    | 25,27 | 25,63 | 25,61      | 24,68 | 25,12 | 0,81        | 0,14453   |
| <i>CTGF</i>   | 25,54    | 25,12 | 25,24 | 24,11      | 23,72 | 24,32 | 0,46        | 0,03952   |
| <i>CTNNB1</i> | 23,93    | 23,50 | 23,87 | 23,46      | 22,05 | 23,02 | 0,58        | 0,00598   |
| <i>CXCL12</i> | NA       | NA    | NA    | 33,95      | 33,40 | 33,99 | -           | -         |
| <i>CYR61</i>  | 27,32    | 26,91 | 27,58 | 26,04      | 24,27 | 25,21 | 0,26        | 0,00011   |
| <i>DNMT1</i>  | 25,41    | 24,90 | 25,44 | 25,31      | 23,95 | 24,72 | 0,73        | 0,00349   |
| <i>EGR1</i>   | 38,99    | NA    | 36,19 | 34,26      | 33,91 | 35,35 | -           | -         |
| <i>ESR1</i>   | 38,48    | 35,70 | 35,84 | NA         | 36,03 | 37,54 | -           | -         |
| <i>EZH2</i>   | 26,78    | 26,37 | 26,53 | 26,42      | 25,65 | 26,36 | 0,83        | 0,36149   |
| <i>FGF2</i>   | 27,83    | 27,43 | 27,54 | 25,90      | 25,14 | 26,02 | 0,29        | 0,00488   |
| <i>FN1</i>    | 27,53    | 27,04 | 27,41 | 23,05      | 21,23 | 22,20 | 0,03        | 0,00001   |
| <i>GAPDH</i>  | 19,47    | 18,94 | 19,59 | 19,92      | 18,53 | 19,12 | NA          | NA        |
| <i>GSK3B</i>  | 25,58    | 25,13 | 25,42 | 24,96      | 23,61 | 24,51 | 0,54        | 0,00468   |
| <i>GSTM5</i>  | NA       | 39,29 | 39,67 | NA         | NA    | NA    | -           | -         |
| <i>GSTP1</i>  | 24,25    | 23,66 | 24,83 | 24,50      | 22,67 | 23,28 | 0,65        | 0,04768   |
| <i>HIF1A</i>  | 22,68    | 22,32 | 22,50 | 22,11      | 21,40 | 22,07 | 0,71        | 0,14372   |
| <i>HMOX1</i>  | 25,93    | 25,35 | 26,32 | 27,68      | 26,10 | 26,79 | 2,19        | 0,00062   |
| <i>HPRT1</i>  | 24,25    | 23,76 | 23,86 | 24,04      | 23,55 | 24,25 | 1,10        | 0,73042   |
| <i>IGF1</i>   | 35,70    | 34,62 | 37,49 | 37,77      | NA    | 37,51 | -           | -         |
| <i>IGF1R</i>  | 32,46    | 32,26 | 32,79 | 27,50      | 26,02 | 26,95 | 0,02        | < 0,00001 |
| <i>IGFBP3</i> | 30,97    | 30,56 | 31,07 | 27,18      | 25,58 | 26,47 | 0,05        | < 0,00001 |
| <i>IL6</i>    | 33,50    | 33,37 | 32,76 | 31,64      | 31,64 | 31,80 | 0,38        | 0,06726   |
| <i>IL8</i>    | 25,72    | 25,28 | 25,52 | 28,02      | 27,05 | 27,81 | 4,79        | 0,00045   |

|                 |       |       |       |       |       |       |      |         |
|-----------------|-------|-------|-------|-------|-------|-------|------|---------|
| <i>JUNB</i>     | 28,13 | 27,50 | 28,77 | 28,77 | 27,24 | 27,96 | 1,00 | 0,98004 |
| <i>KDR</i>      | 25,88 | 25,39 | 25,71 | 28,38 | 27,46 | 28,08 | 5,47 | 0,00021 |
| <i>LARP6</i>    | 34,27 | 34,65 | 35,20 | 35,20 | 33,17 | 33,29 | 0,62 | 0,19181 |
| <i>MAPK1</i>    | 25,62 | 25,23 | 25,61 | 25,26 | 24,08 | 25,05 | 0,68 | 0,04339 |
| <i>MAPK3</i>    | 26,48 | 25,99 | 26,72 | 26,33 | 24,94 | 25,63 | 0,65 | 0,00022 |
| <i>MCL1</i>     | 24,10 | 23,59 | 24,00 | 24,20 | 22,94 | 23,73 | 0,91 | 0,32697 |
| <i>MDM2</i>     | 26,31 | 25,80 | 26,12 | 26,14 | 25,09 | 25,88 | 0,85 | 0,28034 |
| <i>MET</i>      | 24,68 | 24,25 | 24,54 | 23,04 | 21,81 | 22,67 | 0,28 | 0,00035 |
| <i>MKI67</i>    | 25,63 | 25,21 | 25,44 | 25,04 | 23,96 | 24,66 | 0,60 | 0,01418 |
| <i>MLH1</i>     | 27,39 | 26,70 | 27,38 | 26,43 | 24,91 | 25,49 | 0,38 | 0,00003 |
| <i>MMP1</i>     | 26,41 | 25,87 | 26,22 | 26,88 | 25,81 | 26,43 | 1,27 | 0,07676 |
| <i>MMP2</i>     | 34,36 | 33,16 | 34,40 | 37,77 | NA    | NA    | -    | -       |
| <i>MMP7</i>     | 35,83 | 34,11 | 35,19 | 34,14 | 34,35 | 34,16 | 0,62 | 0,30146 |
| <i>MMP9</i>     | 38,30 | NA    | 37,49 | 37,95 | 37,10 | 36,38 | -    | -       |
| <i>MYC</i>      | 21,57 | 21,19 | 21,42 | 24,11 | 23,03 | 23,79 | 5,25 | 0,00021 |
| <i>NOTCH1</i>   | 30,94 | 30,29 | 32,21 | 32,18 | 29,41 | 29,88 | 0,70 | 0,46036 |
| <i>NR3C1</i>    | 27,80 | 27,14 | 27,72 | 28,00 | 26,32 | 27,10 | 0,83 | 0,05823 |
| <i>PCNA</i>     | 23,67 | 23,21 | 23,45 | 23,38 | 23,16 | 23,59 | 1,05 | 0,85282 |
| <i>PDPK1</i>    | 28,26 | 27,94 | 28,75 | 27,75 | 26,05 | 26,79 | 0,40 | 0,00080 |
| <i>PIK3CA</i>   | 27,42 | 26,88 | 27,07 | 25,58 | 24,69 | 25,41 | 0,30 | 0,00193 |
| <i>PLAU</i>     | 25,25 | 24,52 | 26,06 | 25,73 | 24,01 | 24,21 | 0,72 | 0,23186 |
| <i>PLAUR</i>    | 25,76 | 25,18 | 26,36 | 27,24 | 25,17 | 25,78 | 1,36 | 0,19137 |
| <i>PPARG</i>    | 24,91 | 24,35 | 24,84 | 24,17 | 22,67 | 23,40 | 0,45 | 0,00009 |
| <i>PRKCA</i>    | 26,76 | 26,19 | 26,66 | 25,27 | 23,84 | 24,62 | 0,28 | 0,00003 |
| <i>PRKCB</i>    | NA    | 39,22 | NA    | NA    | NA    | NA    | -    | -       |
| <i>PRKCZ</i>    | 27,45 | 27,12 | 27,49 | 26,92 | 25,58 | 26,49 | 0,54 | 0,00343 |
| <i>PTEN</i>     | NA    | NA    | NA    | NA    | NA    | NA    | -    | -       |
| <i>RBM47</i>    | 29,08 | 28,75 | 29,11 | 30,49 | 29,52 | 30,25 | 2,38 | 0,00274 |
| <i>RRM2</i>     | 25,35 | 24,91 | 25,11 | 24,22 | 23,95 | 24,38 | 0,57 | 0,09830 |
| <i>RXRA</i>     | 28,18 | 27,56 | 28,73 | 27,88 | 26,08 | 26,63 | 0,45 | 0,00622 |
| <i>SERPINE1</i> | 25,45 | 25,03 | 25,49 | 24,60 | 23,34 | 24,21 | 0,46 | 0,00102 |
| <i>SOD2</i>     | 24,63 | 24,18 | 24,65 | 25,29 | 24,01 | 24,67 | 1,24 | 0,01390 |
| <i>SP1</i>      | 26,01 | 25,54 | 26,08 | 26,27 | 25,06 | 25,90 | 1,00 | 0,96589 |
| <i>SPARC</i>    | 23,75 | 23,35 | 23,47 | 24,32 | 23,48 | 24,59 | 1,68 | 0,09474 |
| <i>SPP1</i>     | 33,24 | 32,97 | 32,96 | NA    | NA    | 38,11 | -    | -       |
| <i>TBP</i>      | 27,35 | 26,93 | 27,13 | 27,35 | 26,27 | 27,08 | 0,94 | 0,66851 |
| <i>TGFB1</i>    | 25,09 | 24,42 | 25,30 | 25,30 | 23,47 | 24,23 | 0,72 | 0,03323 |
| <i>THBS1</i>    | 28,62 | 28,17 | 28,62 | 27,76 | 26,42 | 27,06 | 0,42 | 0,00004 |
| <i>TIMP1</i>    | 23,58 | 23,05 | 24,00 | 24,20 | 22,55 | 23,19 | 0,94 | 0,55055 |
| <i>TIMP3</i>    | 36,41 | 36,34 | 37,84 | NA    | NA    | 36,78 | -    | -       |
| <i>TLR4</i>     | 30,83 | 30,27 | 30,80 | 38,36 | 38,06 | NA    | -    | -       |
| <i>TNFAIP3</i>  | 31,82 | 31,17 | 31,82 | 29,98 | 28,72 | 29,62 | 0,25 | 0,00011 |
| <i>TNFRSF1A</i> | 25,12 | 24,42 | 25,39 | 26,07 | 24,14 | 24,89 | 1,15 | 0,34544 |
| <i>TOP2A</i>    | 24,64 | 24,20 | 24,63 | 25,26 | 23,95 | 24,78 | 1,24 | 0,05149 |
| <i>TYMS</i>     | 24,45 | 24,02 | 24,23 | 23,00 | 22,08 | 22,68 | 0,35 | 0,00180 |
| <i>VEGFA</i>    | 26,19 | 25,63 | 26,17 | 26,90 | 25,58 | 26,41 | 1,36 | 0,01186 |
| <i>WNT5A</i>    | 28,89 | 28,23 | 29,28 | 28,46 | 26,55 | 27,47 | 0,45 | 0,00399 |
