# Supplementary material for: The Effect of HMGB1 and HMGB2 on Transcriptional Regulation Differs in Neuroendocrine and Adenocarcinoma Models of Prostate Cancer
Source: MDPI journal article supplement (doi:10.3390/ijms25063106), 2024-03-07
Supplement: s1 [file s1]

**Table S1.** Expression of genes in pre-designed primer panels “The PrimePCR Pathway Plate, 96 well Prostatic neoplasms Tier 1 H96, Hsa (Biorad, Hercules, CA, USA)” after *HMGB1* silencing (siHMGB1) and control (si-Control) in three independent biological replica. NA, not acquired.

| Gene symbol   | si-HMGB1 |       |       | si-Control |       |       | Fold change | p-value |
|---------------|----------|-------|-------|------------|-------|-------|-------------|---------|
|               | Cq1      | Cq2   | Cq3   | Cq1        | Cq2   | Cq3   |             |         |
| <i>ACTA2</i>  | 31,34    | 32,14 | 32,12 | 30,98      | 29,55 | 30,50 | 1,94        | 0,0031  |
| <i>AKT1</i>   | 26,19    | 27,24 | 27,03 | 25,84      | 24,30 | 25,00 | 1,64        | 0,0009  |
| <i>AR</i>     | NA       | NA    | 37,61 | 35,98      | 35,18 | 36,41 | -           | -       |
| <i>BAX</i>    | 27,98    | 29,19 | 28,97 | 27,89      | 25,72 | 26,35 | 1,35        | 0,1966  |
| <i>BCL2</i>   | 31,72    | 32,41 | 32,28 | 31,12      | 30,14 | 30,81 | 2,05        | 0,0043  |
| <i>BCL2L1</i> | 24,95    | 26,15 | 25,92 | 25,00      | 23,08 | 23,80 | 1,71        | 0,0153  |
| <i>BDNF</i>   | 30,26    | 31,14 | 30,91 | 29,08      | 28,21 | 29,19 | 1,46        | 0,1096  |
| <i>BIRC5</i>  | 24,39    | 25,42 | 25,16 | 23,89      | 22,64 | 23,36 | 1,74        | 0,0009  |
| <i>BRCA1</i>  | 28,34    | 29,15 | 28,99 | 27,58      | 26,75 | 27,46 | 1,89        | 0,0136  |
| <i>CAV1</i>   | 24,08    | 25,05 | 24,80 | 23,34      | 22,31 | 23,10 | 1,69        | 0,0102  |
| <i>CCL5</i>   | 36,52    | NA    | 35,88 | 36,22      | 35,81 | NA    | -           | -       |
| <i>CCNA2</i>  | 25,83    | 26,73 | 26,37 | 25,59      | 24,44 | 25,13 | 2,34        | 0,0003  |
| <i>CCNB1</i>  | 26,10    | 27,09 | 26,78 | 25,14      | 23,97 | 24,67 | 1,34        | 0,0118  |
| <i>CCND2</i>  | NA       | NA    | NA    | NA         | 36,03 | 37,54 | -           | -       |
| <i>CD44</i>   | 24,38    | 25,24 | 24,95 | 23,57      | 22,86 | 23,31 | 1,83        | 0,0144  |
| <i>CDH1</i>   | 32,75    | 33,66 | 33,87 | 30,01      | 28,56 | 29,54 | 0,34        | 0,0020  |
| <i>CDK1</i>   | 24,02    | 24,88 | 24,54 | 23,48      | 22,70 | 23,36 | 2,27        | 0,0055  |
| <i>CDKN1A</i> | 30,54    | 31,27 | 31,02 | 30,27      | 28,28 | 29,01 | 1,66        | 0,0216  |
| <i>CDKN2A</i> | 26,65    | 27,64 | 27,23 | 25,11      | 25,01 | 25,42 | 1,40        | 0,2920  |
| <i>COL1A1</i> | 33,09    | 33,83 | 33,28 | 32,08      | 30,73 | 30,87 | 1,24        | 0,1788  |
| <i>CTBP2</i>  | 26,58    | 27,55 | 27,15 | 25,61      | 24,68 | 25,12 | 1,44        | 0,0164  |
| <i>CTGF</i>   | 25,46    | 26,38 | 26,02 | 24,11      | 23,72 | 24,32 | 1,49        | 0,1553  |
| <i>CTNNB1</i> | 24,02    | 24,97 | 24,64 | 23,46      | 22,05 | 23,02 | 1,72        | 0,0031  |
| <i>CXCL12</i> | 33,93    | 34,92 | 34,20 | 33,95      | 33,40 | 33,99 | 3,76        | 0,0031  |
| <i>CYR61</i>  | 26,38    | 27,49 | 27,21 | 26,04      | 24,27 | 25,21 | 1,55        | 0,0098  |
| <i>DNMT1</i>  | 26,03    | 27,05 | 26,83 | 25,31      | 23,95 | 24,72 | 1,42        | 0,0044  |
| <i>EGR1</i>   | 35,53    | 37,90 | 37,03 | 34,26      | 33,91 | 35,35 | 1,13        | 0,8081  |
| <i>ESR1</i>   | NA       | NA    | NA    | NA         | 36,03 | 37,54 | -           | -       |
| <i>EZH2</i>   | 27,19    | 28,11 | 27,76 | 26,42      | 25,65 | 26,36 | 1,92        | 0,0147  |
| <i>FGF2</i>   | 27,22    | 27,99 | 27,55 | 25,90      | 25,14 | 26,02 | 1,50        | 0,1073  |
| <i>FN1</i>    | 23,64    | 24,62 | 24,34 | 23,05      | 21,23 | 22,20 | 1,36        | 0,0334  |
| <i>GAPDH</i>  | 21,14    | 22,13 | 21,75 | 19,92      | 18,53 | 19,12 | NA          | NA      |
| <i>GSK3B</i>  | 25,89    | 26,78 | 26,47 | 24,96      | 23,61 | 24,51 | 1,38        | 0,0152  |
| <i>GSTM5</i>  | NA       | 39,24 | NA    | NA         | NA    | NA    | -           | -       |
| <i>GSTP1</i>  | 24,86    | 26,03 | 25,74 | 24,50      | 22,67 | 23,28 | 1,34        | 0,0625  |
| <i>HIF1A</i>  | 23,18    | 23,94 | 23,65 | 22,11      | 21,40 | 22,07 | 1,69        | 0,0391  |
| <i>HMOX1</i>  | 28,65    | 29,86 | 29,68 | 27,68      | 26,10 | 26,79 | 0,96        | 0,6870  |
| <i>HPRT1</i>  | 25,05    | 25,88 | 25,46 | 24,04      | 23,55 | 24,25 | 1,95        | 0,0414  |
| <i>IGF1</i>   | NA       | NA    | NA    | 37,77      | NA    | 37,51 | -           | -       |
| <i>IGF1R</i>  | 28,83    | 30,05 | 29,75 | 27,50      | 26,02 | 26,95 | 0,85        | 0,1543  |
| <i>IGFBP3</i> | 27,12    | 28,11 | 27,94 | 27,18      | 25,58 | 26,47 | 2,26        | 0,0004  |
| <i>IL6</i>    | 33,46    | 34,01 | 33,40 | 31,64      | 31,64 | 31,80 | 1,47        | 0,2882  |
| <i>IL8</i>    | 29,01    | 29,89 | 29,48 | 28,02      | 27,05 | 27,81 | 1,57        | 0,0224  |

|                 |       |       |       |       |       |       |      |        |
|-----------------|-------|-------|-------|-------|-------|-------|------|--------|
| <i>JUNB</i>     | 29,24 | 30,35 | 30,23 | 28,77 | 27,24 | 27,96 | 1,44 | 0,0109 |
| <i>KDR</i>      | 29,78 | 30,79 | 30,58 | 28,38 | 27,46 | 28,08 | 1,05 | 0,6879 |
| <i>LARP6</i>    | 34,51 | 38,35 | 36,52 | 35,20 | 33,17 | 33,29 | 0,94 | 0,9260 |
| <i>MAPK1</i>    | 26,29 | 27,27 | 26,96 | 25,26 | 24,08 | 25,05 | 1,36 | 0,0601 |
| <i>MAPK3</i>    | 27,39 | 28,43 | 28,17 | 26,33 | 24,94 | 25,63 | 1,09 | 0,0992 |
| <i>MCL1</i>     | 25,31 | 26,31 | 26,05 | 24,20 | 22,94 | 23,73 | 1,16 | 0,1005 |
| <i>MDM2</i>     | 27,61 | 28,51 | 28,15 | 26,14 | 25,09 | 25,88 | 1,07 | 0,5797 |
| <i>MET</i>      | 23,87 | 24,78 | 24,50 | 23,04 | 21,81 | 22,67 | 1,52 | 0,0085 |
| <i>MKI67</i>    | 25,71 | 26,61 | 26,29 | 25,04 | 23,96 | 24,66 | 1,79 | 0,0026 |
| <i>MLH1</i>     | 27,26 | 28,35 | 28,04 | 26,43 | 24,91 | 25,49 | 1,15 | 0,0341 |
| <i>MMP1</i>     | 28,96 | 29,80 | 29,50 | 26,88 | 25,81 | 26,43 | 0,68 | 0,0086 |
| <i>MMP2</i>     | NA    | NA    | NA    | 37,77 | NA    | NA    | -    | -      |
| <i>MMP7</i>     | 35,49 | 38,26 | NA    | 34,14 | 34,35 | 34,16 | -    | -      |
| <i>MMP9</i>     | 36,57 | 38,18 | NA    | 37,95 | 37,10 | 36,38 | -    | -      |
| <i>MYC</i>      | 24,83 | 25,85 | 25,50 | 24,11 | 23,03 | 23,79 | 1,66 | 0,0064 |
| <i>NOTCH1</i>   | 31,24 | 32,79 | 32,57 | 32,18 | 29,41 | 29,88 | 1,71 | 0,2180 |
| <i>NR3C1</i>    | 28,75 | 29,93 | 29,51 | 28,00 | 26,32 | 27,10 | 1,17 | 0,0918 |
| <i>PCNA</i>     | 24,39 | 25,36 | 25,03 | 23,38 | 23,16 | 23,59 | 1,91 | 0,0628 |
| <i>PDPK1</i>    | 28,24 | 29,45 | 29,12 | 27,75 | 26,05 | 26,79 | 1,33 | 0,0277 |
| <i>PIK3CA</i>   | 26,49 | 27,26 | 27,03 | 25,58 | 24,69 | 25,41 | 1,72 | 0,0168 |
| <i>PLAU</i>     | 25,55 | 26,81 | 26,58 | 25,73 | 24,01 | 24,21 | 1,77 | 0,0274 |
| <i>PLAUR</i>    | 26,95 | 28,19 | 27,89 | 27,24 | 25,17 | 25,78 | 1,83 | 0,0233 |
| <i>PPARG</i>    | 25,31 | 26,30 | 26,04 | 24,17 | 22,67 | 23,40 | 1,01 | 0,7798 |
| <i>PRKCA</i>    | 26,10 | 27,04 | 26,77 | 25,27 | 23,84 | 24,62 | 1,34 | 0,0027 |
| <i>PRKCB</i>    | NA    | NA    | NA    | NA    | NA    | NA    | -    | -      |
| <i>PRKCZ</i>    | 28,23 | 29,07 | 28,85 | 26,92 | 25,58 | 26,49 | 1,07 | 0,4750 |
| <i>PTEN</i>     | NA    | NA    | NA    | NA    | NA    | NA    | -    | -      |
| <i>RBM47</i>    | 31,38 | 31,82 | 31,67 | 30,49 | 29,52 | 30,25 | 1,93 | 0,0155 |
| <i>RRM2</i>     | 25,36 | 26,27 | 25,92 | 24,22 | 23,95 | 24,38 | 1,76 | 0,0791 |
| <i>RXRA</i>     | 28,29 | 29,56 | 29,26 | 27,88 | 26,08 | 26,63 | 1,24 | 0,1627 |
| <i>SERPINE1</i> | 24,40 | 25,51 | 25,19 | 24,60 | 23,34 | 24,21 | 2,84 | 0,0003 |
| <i>SOD2</i>     | 25,84 | 26,79 | 26,49 | 25,29 | 24,01 | 24,67 | 1,70 | 0,0002 |
| <i>SP1</i>      | 26,85 | 27,73 | 27,58 | 26,27 | 25,06 | 25,90 | 1,79 | 0,0038 |
| <i>SPARC</i>    | 25,90 | 26,60 | 26,35 | 24,32 | 23,48 | 24,59 | 1,26 | 0,3543 |
| <i>SPP1</i>     | NA    | NA    | NA    | NA    | NA    | 38,11 | -    | -      |
| <i>TBP</i>      | 28,12 | 28,94 | 28,72 | 27,35 | 26,27 | 27,08 | 1,73 | 0,0080 |
| <i>TGFB1</i>    | 25,58 | 26,63 | 26,31 | 25,30 | 23,47 | 24,23 | 1,56 | 0,0086 |
| <i>THBS1</i>    | 28,57 | 29,45 | 29,26 | 27,76 | 26,42 | 27,06 | 1,38 | 0,0014 |
| <i>TIMP1</i>    | 24,54 | 25,65 | 25,35 | 24,20 | 22,55 | 23,19 | 1,53 | 0,0038 |
| <i>TIMP3</i>    | 36,42 | NA    | 37,82 | NA    | NA    | 36,78 | -    | -      |
| <i>TLR4</i>     | 37,28 | NA    | NA    | 38,36 | 38,06 | NA    | -    | -      |
| <i>TNFAIP3</i>  | 30,27 | 31,36 | 31,38 | 29,98 | 28,72 | 29,62 | 1,89 | 0,0098 |
| <i>TNFRSF1A</i> | 26,66 | 27,77 | 27,40 | 26,07 | 24,14 | 24,89 | 1,18 | 0,2162 |
| <i>TOP2A</i>    | 25,93 | 26,86 | 26,50 | 25,26 | 23,95 | 24,78 | 1,65 | 0,0017 |
| <i>TYMS</i>     | 23,69 | 24,67 | 24,28 | 23,00 | 22,08 | 22,68 | 1,81 | 0,0054 |
| <i>VEGFA</i>    | 28,03 | 29,01 | 28,74 | 26,90 | 25,58 | 26,41 | 1,14 | 0,1230 |
| <i>WNT5A</i>    | 28,48 | 29,59 | 29,51 | 28,46 | 26,55 | 27,47 | 1,72 | 0,0167 |
| <i>ZWINT</i>    | 24,80 | 25,87 | 25,49 | 24,30 | 22,97 | 23,78 | 1,72 | 0,0008 |
