# Supplementary figures and images for: The Effect of HMGB1 and HMGB2 on Transcriptional Regulation Differs in Neuroendocrine and Adenocarcinoma Models of Prostate Cancer
Source: MDPI journal article supplement (doi:10.3390/ijms25063106), 2024-03-07

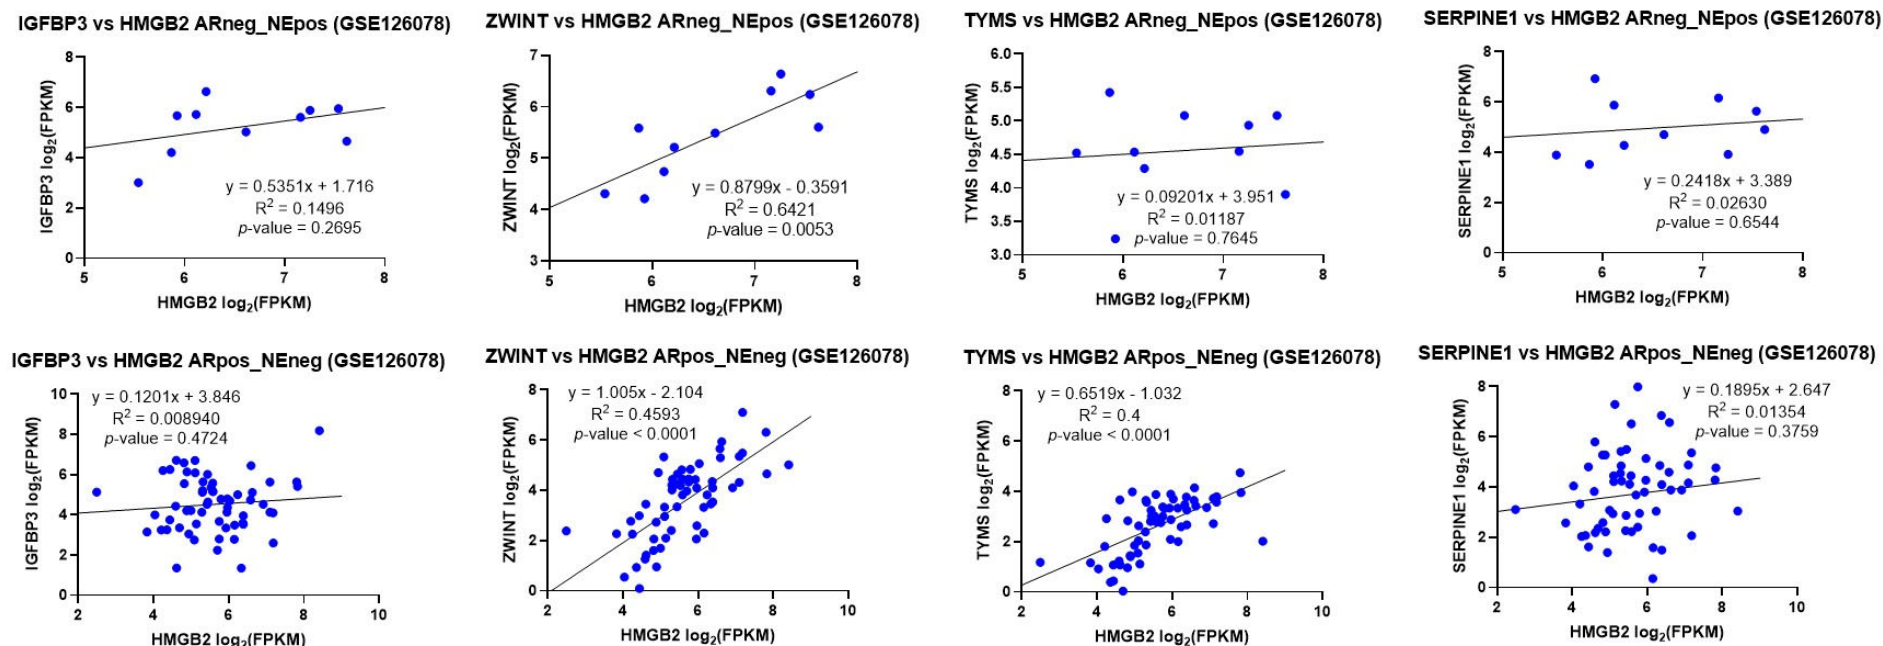

**Figure S4.** Correlation analysis of HMGB2 and target gene expression carried with data from GSE126078

Supplement: s1 [file s1]

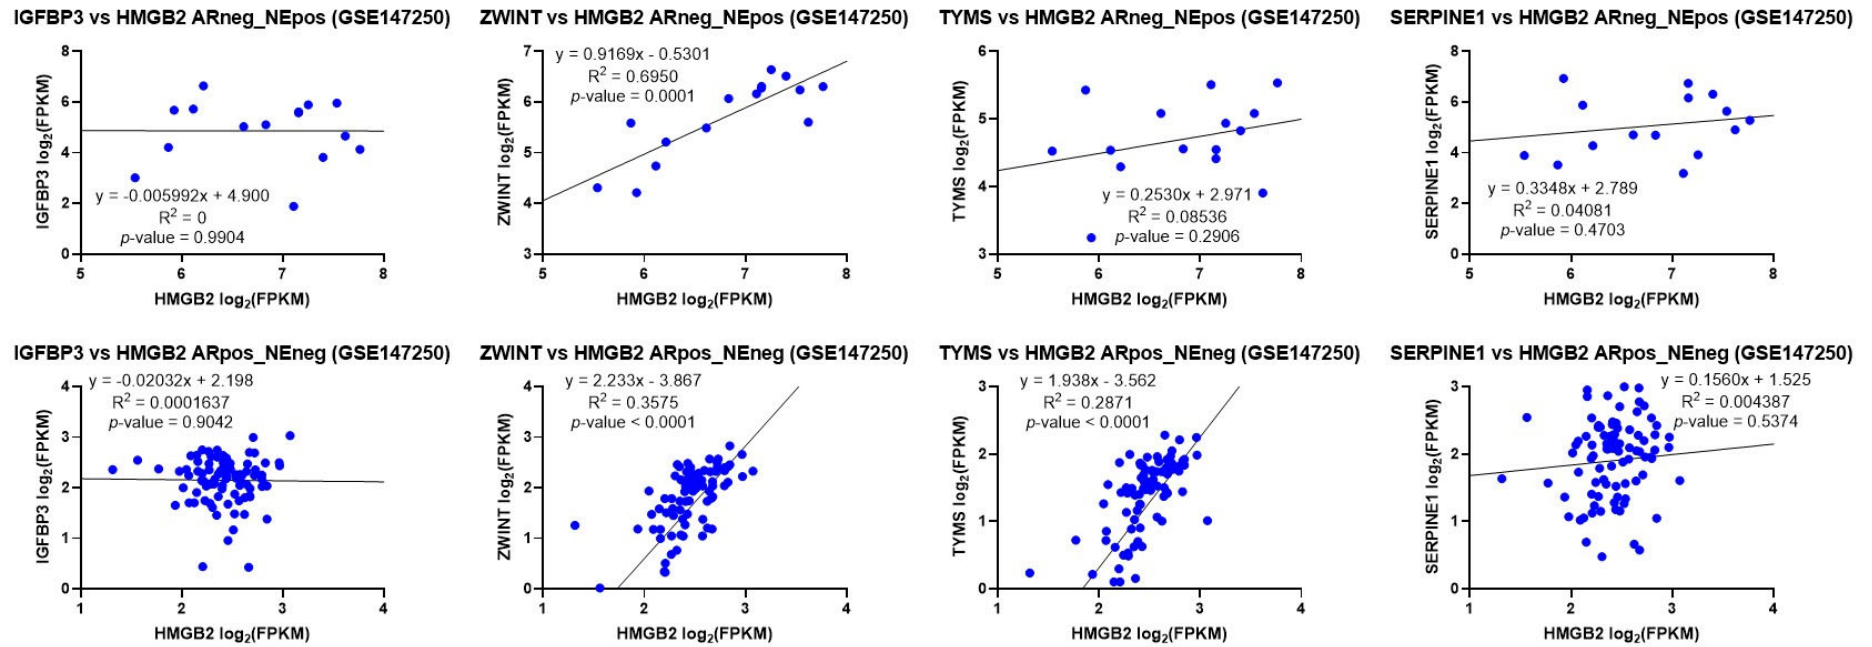

**Figure S5.** Correlation analysis of HMGB2 and target gene expression carried with data from GSE147250

Supplement: s1 [file s1]
